# Supplementary material for: Optimal Icosahedral Copper-based Bimetallic Clusters for the Selective Electrocatalytic CO<sub>2</sub> Conversion to One Carbon Products
Source: Preprints.org preprint supplement (doi:10.20944/preprints202211.0334.v1), 2022-11-17
Supplement: Supplementary file 1 [file supplementary]

## Supplementary Information

### Optimal icosahedral copper-based bimetallic clusters for the selective electrocatalytic CO<sub>2</sub> conversion to one carbon products

Azeem Ghulam Nabi,<sup>\*1,2,3,5</sup> Aman ur Rehman<sup>2,4</sup>, Akhtar Hussain,<sup>5</sup> Gregory A. Chass<sup>1,6,7</sup> and Devis Di Tommaso,<sup>\*1</sup>

<sup>1</sup> Department of Chemistry, School of Physical and Chemical Sciences, Queen Mary University of London, Mile End Road, London, E1 4NS, United Kingdom

<sup>2</sup> Department of Physics and Applied Mathematics, Pakistan Institute of Engineering and Applied Sciences, P. O. Nilore, Islamabad, Pakistan

<sup>3</sup> Department of Physics, University of Gujrat, Jalalpur Jattan Road, Gujrat, Pakistan

<sup>4</sup> Department of Nuclear Engineering, Pakistan Institute of Engineering & Applied Sciences, P.O. Nilore, Islamabad, 45650, Pakistan

<sup>5</sup>Theoretical Physics Division, Pakistan Institute of Nuclear Engineering & Technology (PINSTECH), Islamabad, Pakistan

<sup>6</sup> Department of Chemistry, McMaster University, Hamilton, Ontario, L8S 4L8, Canada

<sup>7</sup> Faculty of Land and Food Systems, The University of British Columbia, Vancouver BC, V6T1Z4, Canada

**TABLE S1.** The energies (E), zero-point energies (ZPE), and entropies (S) of H<sub>2</sub>(g), CO<sub>2</sub>(g) and CO(g), and H<sub>2</sub>O. The entropies of H<sub>2</sub>(g), CO<sub>2</sub>(g) and CO(g) were calculated at 1 atm. The entropy of H<sub>2</sub>O (g=l) was calculated at 0.035 atm, which corresponds to the vapor pressure of liquid water.

| Gas Phase        | E      | ZPE  | $C_p dT$ | TS    | $\Delta G$ |
|------------------|--------|------|----------|-------|------------|
| H <sub>2</sub>   | -6.71  | 0.27 | 0.09     | -0.41 | -6.76      |
| H <sub>2</sub> O | -14.2  | 0.56 | 0.1      | -0.65 | -14.19     |
| CO(g)            | -14.43 | 0.13 | 0.09     | -0.59 | -14.8      |
| CO <sub>2</sub>  | -22.96 | 0.27 | 0.1      | -0.65 | -23.24     |

**Table S2.** The atomic, covalent and Van der Waals radii, the electronegativity difference, electronic configuration, and calculated value of segregation energies (in eV).

| Atomic Symbol | Radius [Å] <sup>[1][2]</sup> |          |               | $\Delta E_N$ (eV) | Electronic Configuration         | Segregation Energy (eV) |       |
|---------------|------------------------------|----------|---------------|-------------------|----------------------------------|-------------------------|-------|
|               | Atomic                       | Covalent | Van-der-Waals |                   |                                  | CN6                     | CN8   |
| <b>Cu</b>     | 1.45                         | 1.38     | 1.40          | 0.00              | 4s <sup>1</sup> 3d <sup>10</sup> |                         |       |
| <b>Ag</b>     | 1.65                         | 1.53     | 1.72          | 0.03              | 5s <sup>1</sup> 4d <sup>10</sup> | -1.46                   | -1.53 |
| <b>Cd</b>     | 1.61                         | 1.48     | 1.58          | 0.21              | 5s <sup>2</sup> 4d <sup>10</sup> | -2.50                   | -2.60 |
| <b>Pd</b>     | 1.69                         | 1.31     | 1.63          | 0.30              | 4p <sup>6</sup> 4d <sup>10</sup> | -0.46                   | -0.59 |
| <b>Pt</b>     | 1.77                         | 1.28     | 1.75          | 0.38              | 5d <sup>9</sup> 6s <sup>1</sup>  | -0.20                   | -0.38 |
| <b>Zn</b>     | 1.42                         | 1.31     | 1.39          | 0.25              | 4s <sup>2</sup> 3d <sup>10</sup> | -0.57                   | -0.68 |

[1] S. Alvarez, "A cartography of the van der Waals territories," *Dalt. Trans.*, vol. 42, no. 24, pp. 8617–8636, 2013, doi: 10.1039/c3dt50599e.

[2] B. Cordero *et al.*, "Covalent radii revisited," *J. Chem. Soc. Dalt. Trans.*, no. 21, pp. 2832–2838, 2008, doi: 10.1039/b801115j.

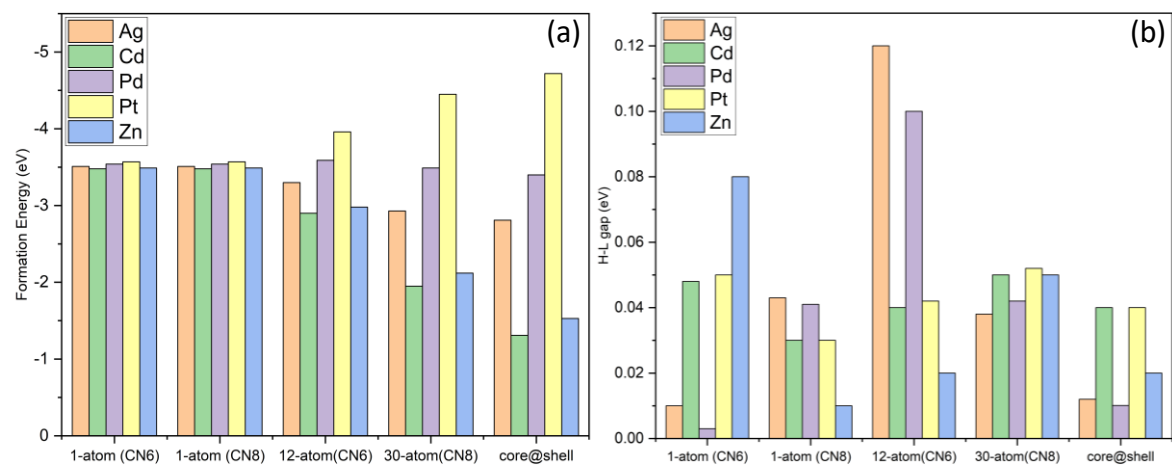

**Figure S1. (a)** The binding energy and **(b)** HOMO-LUMO (H-L) gap of Cu-M clusters with increasing doping concentration.

|    | 1-atom<br>(CN6)                                                                   |                                                                                   | CN8                                                                               |                                                                                   | 12-atom<br>(CN6)                                                                  |                                                                                   | 30-atom<br>(CN8)                                                                  |                                                                                    | Core@Shell                                                                          |                                                                                     |                                                                                     |
|----|-----------------------------------------------------------------------------------|-----------------------------------------------------------------------------------|-----------------------------------------------------------------------------------|-----------------------------------------------------------------------------------|-----------------------------------------------------------------------------------|-----------------------------------------------------------------------------------|-----------------------------------------------------------------------------------|------------------------------------------------------------------------------------|-------------------------------------------------------------------------------------|-------------------------------------------------------------------------------------|-------------------------------------------------------------------------------------|
|    | $\eta(\text{Cu}, \text{C})$                                                       | $\eta(\text{M}, \text{C})$                                                         | $\eta(\text{M}, \text{M})$                                                          | $\eta(\text{M}, \text{M})$                                                          | $\eta(\text{M}, \text{M})$                                                          |
| Ag |  |  |  |  |  |  |  |  |  |  |  |
|    | -2.62                                                                             | -3.27                                                                             | -3.61                                                                             | -3.40                                                                             | -3.64                                                                             | -3.28                                                                             | -3.45                                                                             | -3.41                                                                              | -3.15                                                                               | -3.15                                                                               | -3.14                                                                               |
| Cd |  |  |  |  |  |  |  |  |  |  |  |
|    | -2.81                                                                             | -3.45                                                                             | -3.59                                                                             | -3.24                                                                             | -4.33                                                                             | -3.94                                                                             | -4.20                                                                             | -3.89                                                                              | -3.79                                                                               | -3.22                                                                               | -3.21                                                                               |
| Pd |  |  |  |  |  |  |  |  |  |  |  |
|    | -2.50                                                                             | -3.72                                                                             | -3.51                                                                             | -3.83                                                                             | -3.60                                                                             | -3.84                                                                             | -4.11                                                                             | -4.27                                                                              | -4.21                                                                               | -3.85                                                                               | -3.84                                                                               |
| Pt |  |  |  |  |  |  |  |  |  |  |  |
|    | -2.48                                                                             | -4.19                                                                             | -3.32                                                                             | -4.17                                                                             | -3.51                                                                             | -4.25                                                                             | -3.33                                                                             | -4.62                                                                              | -4.32                                                                               | -4.13                                                                               | -4.15                                                                               |
| Zn |  |  |  |  |  |  |  |  |  |  |  |
|    | -2.96                                                                             | -3.69                                                                             | -3.64                                                                             | -3.41                                                                             | -4.09                                                                             | -3.88                                                                             | -4.37                                                                             | -4.27                                                                              | -4.04                                                                               | -4.44                                                                               | -4.42                                                                               |

**Figure S2.** The structure and adsorption energies (in eV) of COOH adsorbed on the Cu-M clusters.

|    |  | 1-atom (CN6)                                                                      |                                                                                   |                                                                                   |                                                                                   | 1-atom (CN8)                                                                      |                                                                                    |                                                                                     |                                                                                     |
|----|--|-----------------------------------------------------------------------------------|-----------------------------------------------------------------------------------|-----------------------------------------------------------------------------------|-----------------------------------------------------------------------------------|-----------------------------------------------------------------------------------|------------------------------------------------------------------------------------|-------------------------------------------------------------------------------------|-------------------------------------------------------------------------------------|
|    |  | Cu-Top                                                                            | M-Top                                                                             | Bri                                                                               | Hol                                                                               | Cu-Top                                                                            | M-Top                                                                              | Bri                                                                                 | Hol                                                                                 |
| Ag |  | 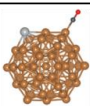 |  |  |  |  |  |  |  |
|    |  | -1.11                                                                             | -0.62                                                                             | -1.11                                                                             | -1.28                                                                             | -1.11                                                                             | -0.57                                                                              | -1.11                                                                               | -1.11                                                                               |
| Cd |  |  |  |  |  |  |  |  |  |
|    |  | -1.13                                                                             | -0.28                                                                             | -1.13                                                                             | -1.27                                                                             | -1.13                                                                             | -0.12                                                                              | -1.13                                                                               | -0.12                                                                               |
| Pd |  |  |  |  |  |  |  |  |  |
|    |  | -1.09                                                                             | -1.31                                                                             | -1.22                                                                             | -1.29                                                                             | -1.03                                                                             | -1.50                                                                              | -1.50                                                                               | -1.54                                                                               |
| Pt |  |  |  |  |  |  |  |  |  |
|    |  | -1.13                                                                             | -1.83                                                                             | -1.13                                                                             | -1.39                                                                             | -1.03                                                                             | -1.90                                                                              | -1.90                                                                               | -1.90                                                                               |
| Zn |  |  |  |  |  |  |  |  |  |
|    |  | -1.14                                                                             | -0.57                                                                             | -1.14                                                                             | -1.30                                                                             | -1.14                                                                             | -0.39                                                                              | -1.14                                                                               | -1.14                                                                               |

**Figure S3.** The structure and adsorption energies (in eV) of CO adsorbed on the  $\text{Cu}_5\text{M}$  clusters with CN6 and CN8 nano-catalysts.

| 12-atom (CN6) |                                                                                   |                                                                                   |                                                                                   | 30-atom (CN8)                                                                     |                                                                                   |                                                                                    |                                                                                     |                                                                                     |
|---------------|-----------------------------------------------------------------------------------|-----------------------------------------------------------------------------------|-----------------------------------------------------------------------------------|-----------------------------------------------------------------------------------|-----------------------------------------------------------------------------------|------------------------------------------------------------------------------------|-------------------------------------------------------------------------------------|-------------------------------------------------------------------------------------|
|               | Cu-Top                                                                            | M-Top                                                                             | Bri                                                                               | Hol                                                                               | Cu-Top                                                                            | M-Top                                                                              | Bri                                                                                 | Hol                                                                                 |
| Ag            | 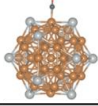 |  |  |  |  |  |  |  |
|               | -1.15                                                                             | -0.64                                                                             | -1.15                                                                             | -1.36                                                                             | -1.08                                                                             | -0.57                                                                              | -1.07                                                                               | -0.75                                                                               |
| Cd            |  |  |  |  |  |  |  |  |
|               | -1.37                                                                             | -0.56                                                                             | -1.37                                                                             | -1.30                                                                             | -1.41                                                                             | -0.43                                                                              | -1.40                                                                               | -0.73                                                                               |
| Pd            |  |  |  |  |  |  |  |  |
|               | -1.02                                                                             | -1.43                                                                             | -1.33                                                                             | -1.30                                                                             | -1.16                                                                             | -1.86                                                                              | -1.98                                                                               | -2.74                                                                               |
| Pt            |  |  |  |  |  |  |  |  |
|               | -0.97                                                                             | -1.97                                                                             | -1.96                                                                             | -1.97                                                                             | -1.18                                                                             | -1.98                                                                              | -1.98                                                                               | -2.34                                                                               |
| Zn            |  |  |  |  |  |  |  |  |
|               | -1.10                                                                             | -0.66                                                                             | -1.10                                                                             | -0.83                                                                             | -1.46                                                                             | -0.79                                                                              | -1.52                                                                               | -1.05                                                                               |

**Figure S4.** The structure and adsorption energies (in eV) of CO on the  $\text{Cu}_{43}\text{M}_{12}$  and  $\text{Cu}_{25}\text{M}_{30}$  clusters.

|    | Core@Shell (CN6)                                                                  |                                                                                   |                                                                                   | Core@Shell (CN8)                                                                  |                                                                                    |                                                                                     |
|----|-----------------------------------------------------------------------------------|-----------------------------------------------------------------------------------|-----------------------------------------------------------------------------------|-----------------------------------------------------------------------------------|------------------------------------------------------------------------------------|-------------------------------------------------------------------------------------|
|    | M-Top                                                                             | Bri                                                                               | Hol                                                                               | M-Top                                                                             | Bri                                                                                | Hol                                                                                 |
| Ag | 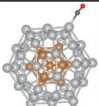 |  |  |  |  |  |
|    | -0.58                                                                             | -0.57                                                                             | -0.62                                                                             | -0.57                                                                             | -0.57                                                                              | -0.62                                                                               |
| Cd |  |  |  |  |  |  |
|    | -0.50                                                                             | -0.21                                                                             | -0.23                                                                             | -0.21                                                                             | -0.21                                                                              | -0.23                                                                               |
| Pd |  |  |  |  |  |  |
|    | -1.40                                                                             | -2.06                                                                             | -2.24                                                                             | -1.62                                                                             | -2.06                                                                              | -2.24                                                                               |
| Pt |  |  |  |  |  |  |
|    | -1.89                                                                             | -2.21                                                                             | -2.12                                                                             | -1.92                                                                             | -2.21                                                                              | -2.12                                                                               |
| Zn |  |  |  |  |  |  |
|    | -0.94                                                                             | -0.94                                                                             | -0.95                                                                             | -0.35                                                                             | -0.94                                                                              | -0.95                                                                               |

**Figure S5.** The structure and adsorption energies (in eV) of CO on the  $\text{Cu}_{43}\text{M}_{12}$  and  $\text{Cu}_{25}\text{M}_{30}$  clusters.

|    |  | 1-atom (CN6) |                                                                                   |                                                                                   |                                                                                   | 1-atom (CN8)                                                                      |                                                                                   |                                                                                     |                                                                                     |
|----|--|--------------|-----------------------------------------------------------------------------------|-----------------------------------------------------------------------------------|-----------------------------------------------------------------------------------|-----------------------------------------------------------------------------------|-----------------------------------------------------------------------------------|-------------------------------------------------------------------------------------|-------------------------------------------------------------------------------------|
|    |  | Cu-Top       | M-Top                                                                             | Bri                                                                               | Hol                                                                               | Cu-Top                                                                            | M-Top                                                                             | Bri                                                                                 | Hol                                                                                 |
| Ag |  |              |                                                                                   |                                                                                   |  |                                                                                   |                                                                                   |  |  |
|    |  | 2.85         | 2.85                                                                              | 2.85                                                                              | 2.85                                                                              | 3.14                                                                              | 3.32                                                                              | 3.32                                                                                | 3.14                                                                                |
| Cd |  |              |  |                                                                                   |  |                                                                                   |  |  |                                                                                     |
|    |  | 2.84         | 3.60                                                                              | 2.84                                                                              | 2.84                                                                              | 3.15                                                                              | 3.90                                                                              | 3.49                                                                                | 3.14                                                                                |
| Pd |  |              |                                                                                   |  |  |                                                                                   |  |  |  |
|    |  | 3.03         | 3.11                                                                              | 3.11                                                                              | 3.03                                                                              | 2.95                                                                              | 3.06                                                                              | 3.06                                                                                | 2.95                                                                                |
| Pt |  |              |                                                                                   |  |  |                                                                                   |  |  |  |
|    |  | 2.96         | 2.95                                                                              | 2.94                                                                              | 2.94                                                                              | 2.92                                                                              | 3.01                                                                              | 2.89                                                                                | 2.88                                                                                |
| Zn |  |              |  |                                                                                   |  |  |  |  |  |
|    |  | 2.81         | 3.50                                                                              | 3.29                                                                              | 2.81                                                                              | 3.16                                                                              | 3.74                                                                              | 3.40                                                                                | 3.20                                                                                |

**Figure S6.** The structure and adsorption energies of H adsorbed on the  $\text{Cu}_{43}\text{M}_{12}$  and  $\text{Cu}_{25}\text{M}_{30}$  clusters at the Top, Hollow and Bridge positions.



| 12-atom (CN6) |        |                                                                                   |                                                                                   | 30-atom (CN8)                                                                     |        |                                                                                    |                                                                                     |                                                                                     |
|---------------|--------|-----------------------------------------------------------------------------------|-----------------------------------------------------------------------------------|-----------------------------------------------------------------------------------|--------|------------------------------------------------------------------------------------|-------------------------------------------------------------------------------------|-------------------------------------------------------------------------------------|
|               | Cu-Top | M-Top                                                                             | Bri                                                                               | Hol                                                                               | Cu-Top | M-Top                                                                              | Bri                                                                                 | Hol                                                                                 |
| Ag            |        |                                                                                   |  |  |        |                                                                                    |  |  |
|               | 3.35   | 2.81                                                                              | 3.35                                                                              | 2.82                                                                              | 3.24   | 3.24                                                                               | 3.32                                                                                | 3.24                                                                                |
| Cd            |        |  |  |  |        |  |  |                                                                                     |
|               | 2.92   | 3.12                                                                              | 2.92                                                                              | 2.63                                                                              | 3.54   | 3.46                                                                               | 3.49                                                                                | 3.46                                                                                |
| Pd            |        |                                                                                   |  |  |        |                                                                                    |                                                                                     |  |
|               | 2.96   | 2.91                                                                              | 2.96                                                                              | 2.91                                                                              | 3.54   | 3.46                                                                               | 3.49                                                                                | 3.46                                                                                |
| Pt            |        |                                                                                   |  |  |        |  |  |                                                                                     |
|               | 2.80   | 2.80                                                                              | 2.80                                                                              | 2.87                                                                              | 2.60   | 2.71                                                                               | 2.57                                                                                | 2.60                                                                                |
| Zn            |        |  |  |  |        |  |  |  |
|               | 3.20   | 3.35                                                                              | 3.20                                                                              | 3.14                                                                              | 2.85   | 3.15                                                                               | 2.87                                                                                | 2.93                                                                                |

**Figure S7.** The structure and adsorption energies of H adsorbed on the  $\text{Cu}_{43}\text{M}_{12}$  and  $\text{Cu}_{25}\text{M}_{30}$  clusters at Top, Hollow and Bridge positions.

| Core@Shell (CN6) |                                                                                   |                                                                                   | Core@Shell (CN8)                                                                  |                                                                                   |                                                                                    |                                                                                     |
|------------------|-----------------------------------------------------------------------------------|-----------------------------------------------------------------------------------|-----------------------------------------------------------------------------------|-----------------------------------------------------------------------------------|------------------------------------------------------------------------------------|-------------------------------------------------------------------------------------|
|                  | M-Top                                                                             | Bri                                                                               | Hol                                                                               | M-Top                                                                             | Bri                                                                                | Hol                                                                                 |
| Ag               |  |  |  |  |  |  |
|                  | 3.52                                                                              | 3.52                                                                              | 3.40                                                                              | 3.53                                                                              | 3.51                                                                               | 3.41                                                                                |
| Cd               |  |  |  |  |  |  |
|                  | 4.10                                                                              | 4.10                                                                              | 4.10                                                                              | 4.10                                                                              | 4.10                                                                               | 4.10                                                                                |
| Pd               |  |  |  |  |  |  |
|                  | 2.88                                                                              | 2.88                                                                              | 2.72                                                                              | 2.85                                                                              | 2.82                                                                               | 2.73                                                                                |
| Pt               |  |  |  |  |  |  |
|                  | 2.74                                                                              | 2.74                                                                              | 2.81                                                                              | 2.74                                                                              | 2.75                                                                               | 2.82                                                                                |
| Zn               |  |  |  |  |  |  |
|                  | 2.69                                                                              | 2.69                                                                              | 2.68                                                                              | 2.68                                                                              | 2.67                                                                               | 2.69                                                                                |

**Figure S8.** The structures and adsorption energies of H adsorbed on the core@shell clusters at Top, Hollow and Bridge positions.

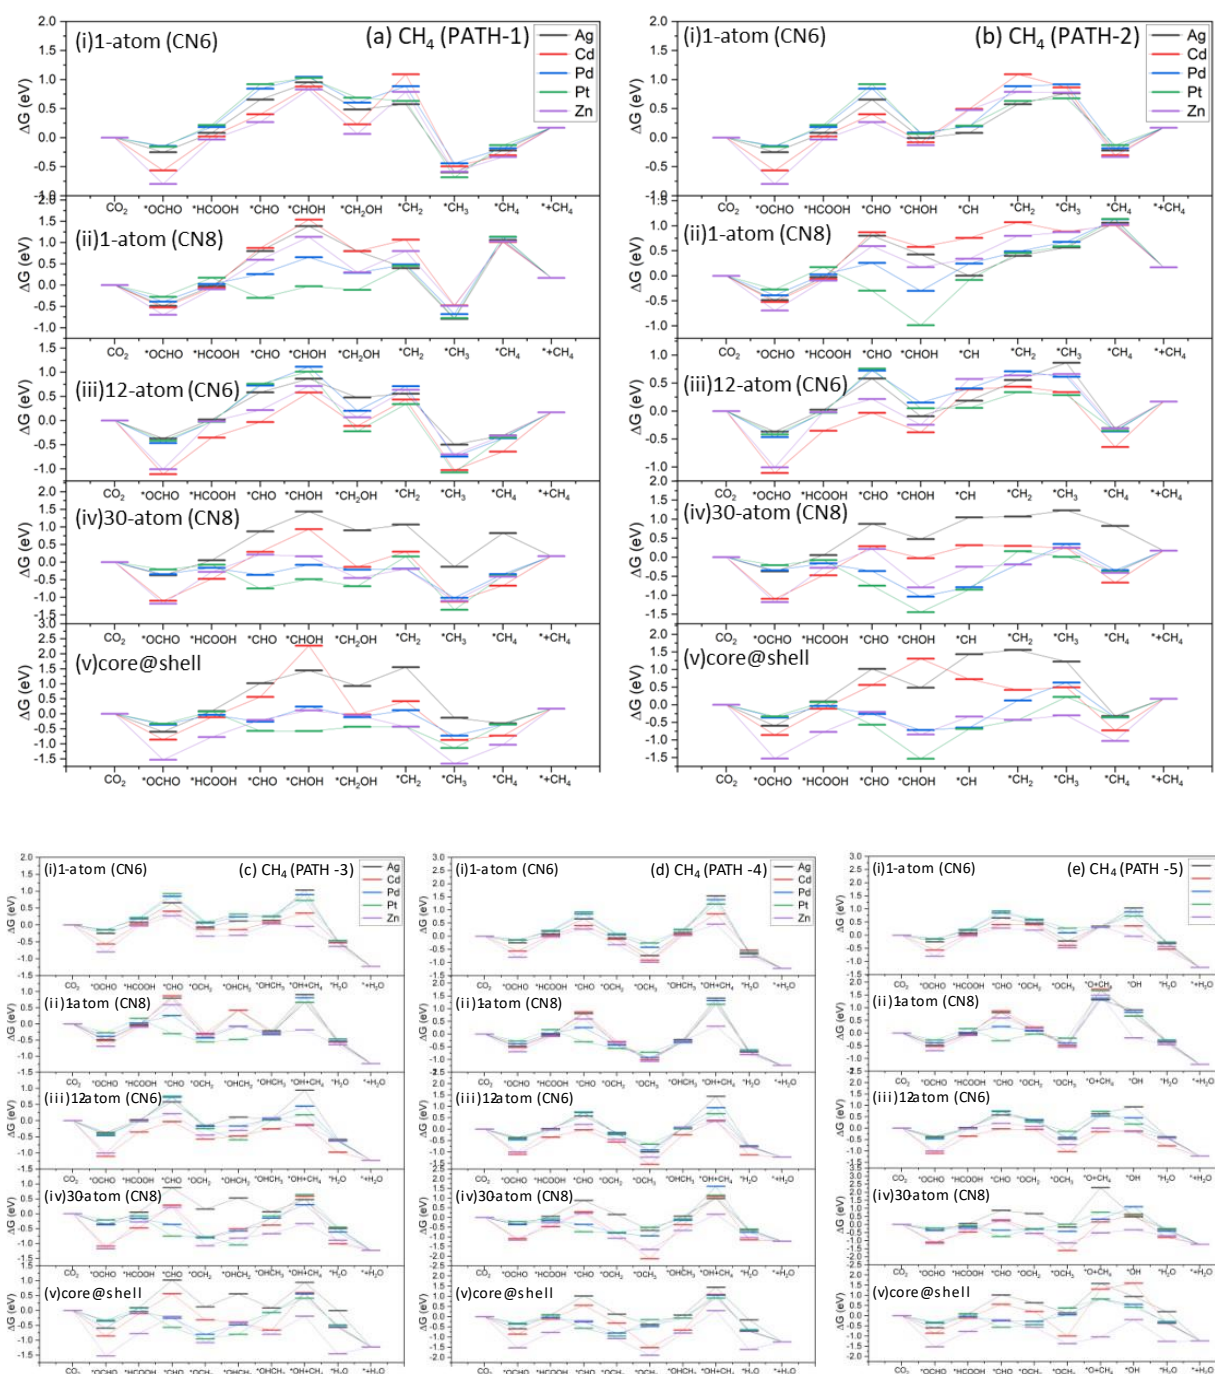

**Figure S9.** Gibbs free energy diagram for the CH<sub>4</sub> formation on CuM clusters along pathways 1 to 5: **(1)** \*CHO → \*CHOH → \*CH → \*CH<sub>2</sub> → \*CH<sub>3</sub> → \* + CH<sub>4</sub>; **(2)** \*CHO → \*CHOH → \*CH<sub>2</sub>OH → \*CH<sub>2</sub> → \*CH<sub>3</sub> → \* + CH<sub>4</sub>; **(3)** \*CHO → \*OCH<sub>2</sub> → \*OHCH<sub>2</sub> → \*OHCH<sub>3</sub> → \*OH + CH<sub>4</sub> → \* + H<sub>2</sub>O; **(4)** \*CHO → \*OCH<sub>2</sub> → \*OCH<sub>3</sub> → \*OHCH<sub>3</sub> → \*OH + CH<sub>4</sub> → \* + H<sub>2</sub>O; **(5)** \*CHO → \*OCH<sub>2</sub> → \*OCH<sub>3</sub> → \*O + CH<sub>4</sub> → \*OH → \* + H<sub>2</sub>O.

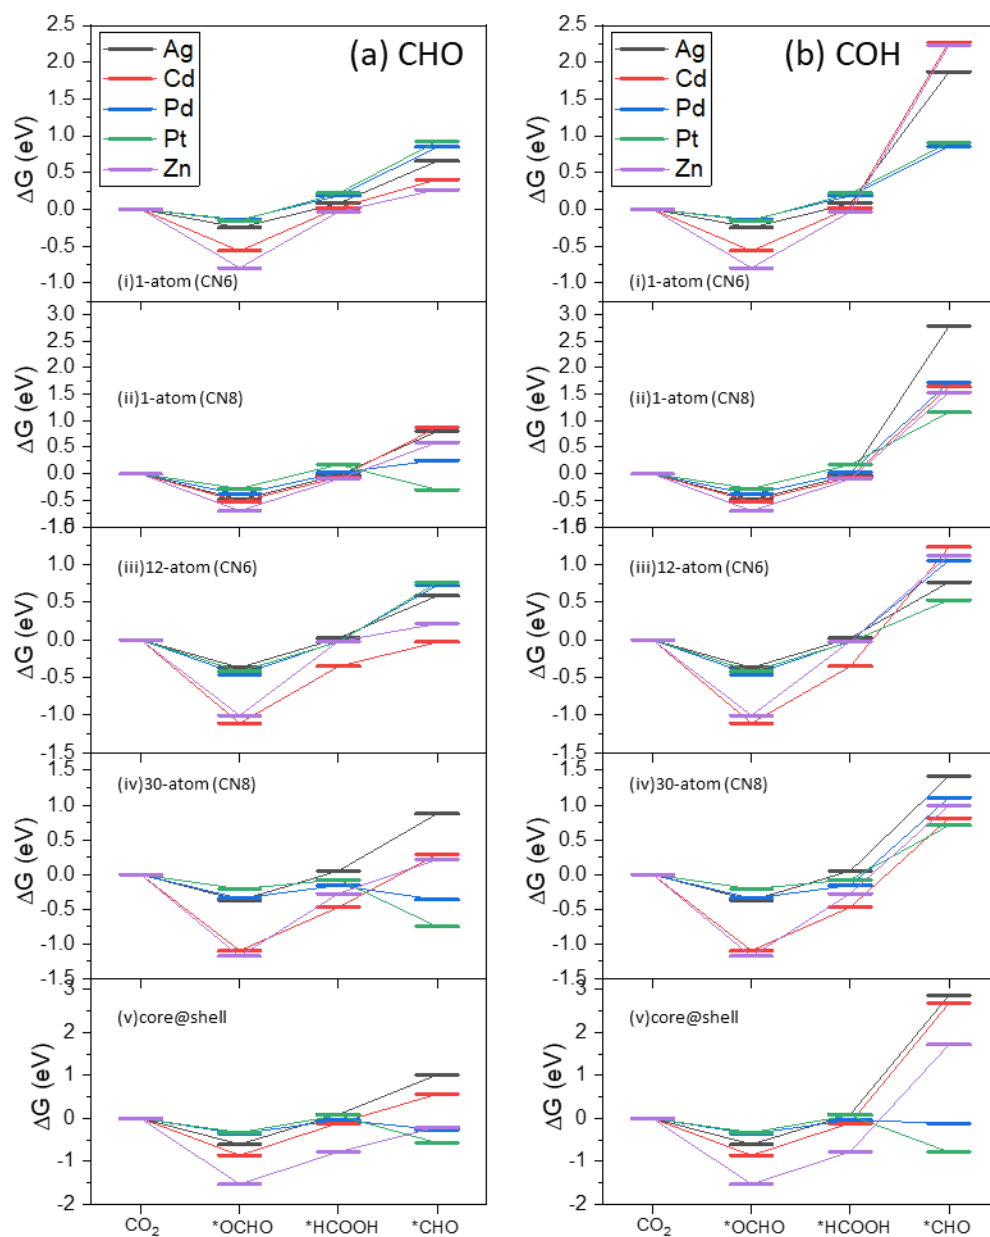

**Figure S10.** Gibbs free energy diagram for CHO (a) and COH (b) formation on CuM clusters.
